# Supplementary material
Source: PubMed Central journal article supplement (PMC6504163)
Supplement: DS1_JVD_10.1177_1040638717731491.pdf [file DS1_JVD_10.1177_1040638717731491.pdf]

**Supplementary Table 1.** *Mycoplasma bovis* strains used for preliminary screening of candidate genes for multi-locus sequence typing.

| Loci        | Isolate                  | Breed       | Affected body system | Location (Canadian postal code) |
|-------------|--------------------------|-------------|----------------------|---------------------------------|
| <i>adk</i>  | 1971 <i>M. bovis</i> 227 | Beef        | Arthritis/joint      | N                               |
|             | 1978-M3262               | Dairy       | Respiratory          | N                               |
|             | 1979-M3713               | Unknown     | Reproductive         | Unknown                         |
|             | 1981-M5242               | Dairy       | Respiratory          | QC                              |
|             | 1982-M6152               | Dairy       | Respiratory          | N                               |
|             | 1982-M6415               | Beef        | Eye                  | N                               |
|             | 1988-M12230-8            | Dairy       | Mastitis/udder       | K                               |
|             | 2008-002006              | Beef        | Respiratory          | N                               |
|             | 2009-012575              | Dairy       | Mastitis/udder       | N                               |
|             | 2008-049894              | Beef        | Respiratory          | K                               |
| <i>efp</i>  | 1971 <i>M. bovis</i> 227 | Beef        | Arthritis/joint      | N                               |
|             | 2009-012575              | Dairy       | Mastitis/udder       | N                               |
|             | AFLP-170                 | Beef        | Respiratory          | N                               |
|             | AFLP-186                 | Beef        | Respiratory          | N                               |
|             | AFLP-188                 | Beef        | Respiratory          | N                               |
| <i>gmk</i>  | 1971 <i>M. bovis</i> 227 | Beef        | Arthritis/joint      | N                               |
|             | 1988-M12230-8            | Dairy       | Mastitis/udder       | K                               |
|             | 2009-12575               | Dairy       | Mastitis/udder       | N                               |
|             | AFLP-170                 | Beef        | Respiratory          | N                               |
|             | AFLP-186                 | Beef        | Respiratory          | N                               |
|             | AFLP-188                 | Beef        | Respiratory          | N                               |
| <i>gyrB</i> | 1971 <i>M. bovis</i> 227 | Beef        | Arthritis/joint      | N                               |
|             | 1978-M3262               | Dairy       | Respiratory          | N                               |
|             | 1982-M6870               | Beef        | Respiratory          | N                               |
|             | 1982-6995-cap            | Caprine     | Respiratory          | L                               |
|             | 1983-M7337               | Beef        | Respiratory          | L                               |
|             | 1984-M7922               | Dairy       | Arthritis/joint      | L                               |
|             | 1986-M10179              | Dairy       | Reproductive         | K                               |
|             | 1986-M10080              | Veal        | Other/unknown        | K                               |
|             | 1987-M10916              | Beef        | Respiratory          | N                               |
|             | 1988-M11985              | Beef        | Reproductive         | N                               |
|             | 1989-M13696              | Beef        | Arthritis/joint      | N                               |
|             | 1992-M15950              | Beef        | Respiratory          | N                               |
| 1991-M14729 | Other                    | Respiratory | N                    |                                 |
| 1994-M17952 | Beef                     | Respiratory | L                    |                                 |

| Loci        | Isolate                  | Breed   | Affected body system | Location (Canadian postal code) |
|-------------|--------------------------|---------|----------------------|---------------------------------|
|             | 1997-M21852              | Dairy   | Respiratory          | N                               |
|             | 2000-M25499              | Dairy   | Respiratory          | N                               |
|             | 2004-M29780              | Dairy   | Other/unknown        | N                               |
|             | 2008-002006              | Beef    | Respiratory          | N                               |
|             | 2009-046526              | Beef    | Respiratory          | N                               |
| <i>rpoB</i> | 1971 <i>M. bovis</i> 227 | Beef    | Arthritis/joint      | N                               |
|             | 1988-M12230-8            | Dairy   | Mastitis/udder       | K                               |
|             | 2008-007578              | Unknown | Unknown              | Unknown                         |
|             | 2009-012575              | Dairy   | Mastitis/udder       | N                               |
|             | AFLP-170                 | Beef    | Respiratory          | N                               |
|             | AFLP-186                 | Beef    | Respiratory          | N                               |
|             | AFLP-188                 | Beef    | Respiratory          | N                               |
| <i>tpiA</i> | 1971 <i>M. bovis</i> 227 | Beef    | Arthritis/joint      | N                               |
|             | 1978-M3262               | Dairy   | Respiratory          | N                               |
|             | 1979-M3713               | Unknown | Reproductive         | Unknown                         |
|             | 1981-M5242               | Dairy   | Respiratory          | QC                              |
|             | 1982-M6152               | Beef    | Eye                  | N                               |
|             | 1988-M12230-8            | Dairy   | Mastitis/udder       | K                               |
|             | 2008-002006              | Beef    | Respiratory          | N                               |
|             | 2008-049894              | Beef    | Respiratory          | K                               |
|             | AFLP-170                 | Beef    | Respiratory          | N                               |
|             | AFLP-186                 | Beef    | Respiratory          | N                               |
|             | AFLP-188                 | Beef    | Respiratory          | N                               |

AFLP = amplified fragment length polymorphism.
